# Supplementary material
Source: MDPI journal article supplement (https://www.mdpi.com/2077-0472/12/7/1023)
Supplement: s1 [file s1]

## Supplemental material Agriculture

**Table S1.** Mineral contents of experimental dietary treatments for cattle feeding.

| Minerals                 | Feed Ingredients |      |      |      |      |      | Diets |      |      |      | SEM  |
|--------------------------|------------------|------|------|------|------|------|-------|------|------|------|------|
|                          | 1                | 2    | 3    | 4    | 5    | 6    | D1    | D2   | D3   | D4   |      |
| Macro minerals, g/kg DM  |                  |      |      |      |      |      |       |      |      |      |      |
| Phosphorous              | 0.12             | 0.16 | 0.30 | 0.72 | 0.14 | 0.80 | 0.26  | 0.25 | 0.28 | 0.28 | 0.04 |
| Potassium                | 1.03             | 1.77 | 0.39 | 2.38 | 2.10 | 1.92 | 0.71  | 0.83 | 1.08 | 0.67 | 1.02 |
| Calcium                  | 0.25             | 0.80 | 0.05 | 0.21 | 10.5 | 2.35 | 0.27  | 0.74 | 1.33 | 0.29 | 1.04 |
| Magnesium                | 0.10             | 0.29 | 0.12 | 0.30 | 2.24 | 0.40 | 0.14  | 0.32 | 0.47 | 0.14 | 0.10 |
| Micro minerals, mg/kg DM |                  |      |      |      |      |      |       |      |      |      |      |
| Sodium                   | 176              | 624  | 0.01 | 37.0 | 113  | 1919 | 3378  | 1379 | 1720 | 1962 | 5.04 |
| Iron                     | 98.4             | 85.6 | 37.0 | 86.4 | 430  | 909  | 202   | 273  | 275  | 321  | 3.04 |
| Manganese                | 61.1             | 26.1 | 5.00 | 36.6 | 756  | 276  | 48.0  | 91.1 | 141  | 58.0 | 2.36 |
| Copper                   | 4.00             | 7.77 | 2.00 | 11.3 | 7.44 | 86.4 | 7.72  | 10.8 | 14.9 | 10.6 | 1.34 |
| Zinc                     | 17.6             | 25.8 | 21.0 | 50.3 | 56.7 | 248  | 39.7  | 39.9 | 51.4 | 46.0 | 2.97 |
| Boron                    | 4.09             | 25.7 | 0.00 | 46.9 | 37.0 | 4.86 | 4.14  | 9.05 | 13.9 | 4.08 | 1.91 |
| Aluminium                | 82.0             | 51.0 | 0.00 | 15.0 | 510  | 700  | 120   | 170  | 220  | 100  | 2.98 |

Feed Ingredients: **1** = Grass hay (*E. tef*); **2** = Lucerne (*M. sativa*); **3** = Yellow maize; **4** = Soy bean (OCM); **5** = Cactus; **6**= Molasses. **D1** = Control diet with no commercial ingredients; **D2** =10% Cactus diet (natural pasture hay + irrigated pasture hay + crop-based energy and protein supplements + 10% Cactus); **D3** = 20% Cactus diet (natural pasture hay + irrigated pasture hay + crop-based energy and protein supplements + 20% Cactus); **D4** = Commercial diet.

DM = Dry matter.

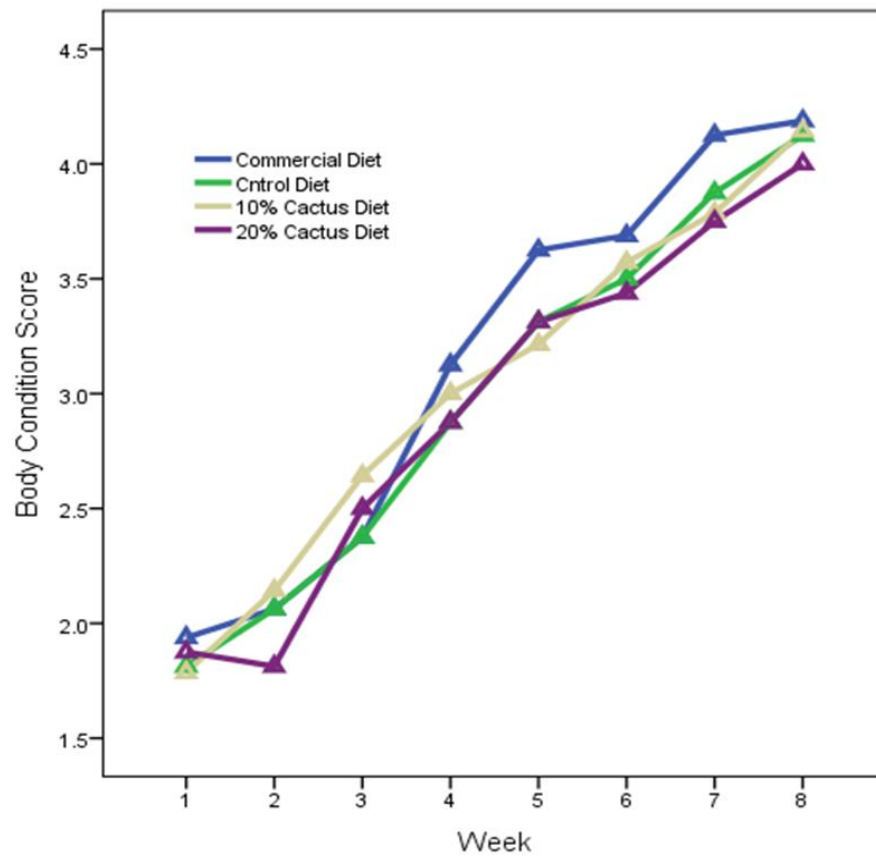

**Figure S1:** Body condition score over time of cattle fed cactus and non-cactus diets
